# Supplementary material for: Characterization and Discrimination of Ancient Grains: A Metabolomics Approach
Source: PubMed Central journal article supplement (PMC5000615; doi:10.3390/ijms17081217), 2016-07-27
Supplement: ijms-17-01217-s001.pdf [file ijms-17-01217-s001.pdf]

# Supplementary Materials: Characterization and Discrimination of Ancient Grains: A Metabolomics Approach

Laura Righetti, Josep Rubert, Gianni Galaverna, Silvia Folloni, Roberto Ranieri, Stranska-Zachariasova, Jana Hajslova and Chiara Dall'Asta

**Table S1.** Misclassification tables related to OPLS-DA models. Panel A shows that one sample from the ID331 (einkorn) was mixed up with the group of Garfagnana (emmer), decreasing the percentage of total correct classification up to 98.7 in the ESI(+) OPLS-DA model. Panel B indicates that 100% of ancient wheat lines (3 out of 3) were correctly classified in the ESI(-) data. Low probabilities ( $p = 4.30 \times 10^{-27}$  and  $p = 7.10 \times 10^{-27}$ ) of random table generation, assessed by Fisher's Exact Probability, were found for both ESI models.

| A             | Members                | Correct | Garfagnana | Rouquin | ID331 |
|---------------|------------------------|---------|------------|---------|-------|
| Garfagnana    | 25                     | 100%    | 25         | 0       | 0     |
| Rouquin       | 26                     | 100%    | 0          | 26      | 0     |
| ID331         | 26                     | 96.15%  | 1          | 0       | 25    |
| No class      | 0                      |         | 0          | 0       | 0     |
| Total         | 77                     | 98.70%  | 26         | 26      | 25    |
| Fishers prob. | $4.30 \times 10^{-27}$ |         |            |         |       |
| B             | Members                | Correct | Garfagnana | Rouquin | ID331 |
| Garfagnana    | 25                     | 100%    | 25         | 0       | 0     |
| Rouquin       | 26                     | 100%    | 0          | 26      | 0     |
| ID331         | 26                     | 100%    | 0          | 0       | 26    |
| No class      | 0                      |         | 0          | 0       | 0     |
| Total         | 77                     | 100%    | 25         | 26      | 26    |
| Fishers prob. | $7.10 \times 10^{-27}$ |         |            |         |       |

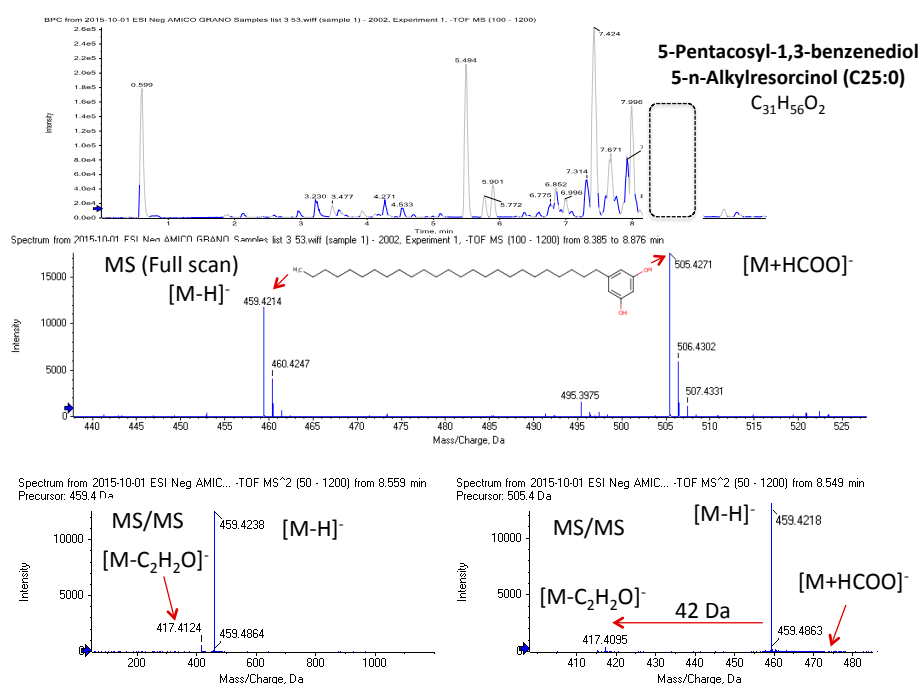

**Figure S2.** 5-Pentacosyl-1,3-benzenediol 5-n-Alkylresorcinol (C25:0) identification workflow; (i) Base Peak Chromatogram; (ii) MS spectra from 8.38 to 8.87 and (iii)  $m/z$  459.4214 (deprotonated) and  $m/z$  505.4271 ( $[M + HCOO]^-$ ) MS/MS pathways.
